# Supplementary material
Source: PubMed Central journal article supplement (PMC7035926)
Supplement: zii999093010s1.pdf [file zii999093010s1.pdf]

1  
2  
3  
4  
5

**SUPPLEMENTAL INFORMATION**

**SUPPLEMENTAL TABLES**

**Table S1. Strains used in this study.**

| <b>Strain</b>                        | <b>Description</b>                  | <b>Reference/Source</b> |
|--------------------------------------|-------------------------------------|-------------------------|
| <b>methicillin resistant strains</b> |                                     |                         |
| wild type                            | USA300 JE2                          | (1)                     |
| <i>tcyA</i> ::Tn                     | <i>tcyA</i> ::erm                   | (1)                     |
| <i>tcyP</i> ::Tn                     | <i>tcyP</i> ::erm                   | (1)                     |
| <i>tcyP</i> ::Tn                     | <i>tcyP</i> ::tet                   | This study              |
| <i>tcyAP</i> ::Tn                    | <i>tcyA</i> ::erm <i>tcyP</i> ::tet | This study              |
| <b>methicillin sensitive strains</b> |                                     |                         |
| wild type                            | Newman                              | (2)                     |
| <i>tcyA</i> ::Tn                     | <i>tcyA</i> ::erm                   | This study              |
| <i>tcyP</i> ::Tn                     | <i>tcyP</i> ::erm                   | This study              |
| <i>tcyP</i> ::Tn                     | <i>tcyP</i> ::tet                   | This study              |
| <i>tcyAP</i> ::Tn                    | <i>tcyA</i> ::erm <i>tcyP</i> ::tet | This study              |

**Table S2. Primers used in this study.**

| <b>Primers</b>                              | <b>Description</b>                                                               | <b>Sequence</b>                                                      |
|---------------------------------------------|----------------------------------------------------------------------------------|----------------------------------------------------------------------|
| <i>tcyP</i><br>ORF F                        | sequencing <i>tcyP</i> ORF                                                       | AAGTTCAACATATTGACTTATCCGGC                                           |
| <i>tcyP</i><br>ORF R                        | sequencing <i>tcyP</i> ORF                                                       | TAGGAATTGAATATTTGACCAAACC                                            |
| P <sub><i>tcyP</i></sub> F                  | sequencing <i>tcyP</i> promoter                                                  | GCGAGCCATCATGTGCAATATTACG                                            |
| P <sub><i>tcyP</i></sub> R                  | sequencing <i>tcyP</i> promoter                                                  | CGAATCGCACAAAGTGCACACTC                                              |
| pKK22 F                                     | amplification for pKK22 for Gibson assembly                                      | GCGGCCGCTAGCCTAGGAGC                                                 |
| pKK22 R                                     | amplification for pKK22 for Gibson assembly                                      | ATCGCCTGTCACTTTGCTTGATATATGA                                         |
| P <sub><i>tcyP</i></sub><br><i>tcyP</i> F   | amplification of P <sub><i>tcyP</i></sub> <i>tcyP</i> for cloning into pKK22     | AGCAAAGTGACAGGCGATGCGGCCGCA<br>GAATTTTTTACAACGTGTTTG                 |
| P <sub><i>tcyP</i></sub><br><i>tcyP</i> R   | amplification of P <sub><i>tcyP</i></sub> <i>tcyP</i> for cloning into pKK22     | GAGCTCCTAGGCTAGCGGCCTTAGTGTG<br>AAGTTAATGCAG                         |
| P <sub><i>tcyABC</i></sub><br><i>tcyABC</i> | amplification of P <sub><i>tcyABC</i></sub> <i>tcyABC</i> for cloning into pKK22 | AGC AAA GTG ACA GGC GAT GCT GTT<br>GGC AAC AGT TTA TG                |
| P <sub><i>tcyABC</i></sub><br><i>tcyABC</i> | amplification of P <sub><i>tcyABC</i></sub> <i>tcyABC</i> for cloning into pKK22 | TAC CGA GCT CCT AGG CTA GCT TAT<br>TCT TCA TTT ATA ACA TTT AAG AAA C |
| <i>rho</i> F                                | qRT-PCR                                                                          | AAACGTCCGCATTTCCAAGC                                                 |
| <i>rho</i> R                                | qRT-PCR                                                                          | TGGCGCCACTATTAACCAC                                                  |
| <i>tcyA</i> F                               | qRT-PCR                                                                          | TATTGGCTGCATGCGGAAAC                                                 |
| <i>tcyA</i> R                               | qRT-PCR                                                                          | AATGGTGCATAAGTCCCCTCAG                                               |
| <i>tcyP</i> F                               | qRT-PCR                                                                          | TGCTGCGATTGTTGGTGTG                                                  |
| <i>tcyP</i> R                               | qRT-PCR                                                                          | ATTCGCTTCCACGTGCTTG                                                  |

6  
7

8 SUPPLEMENTAL FIGURES

9  
10 **Figure S1.**

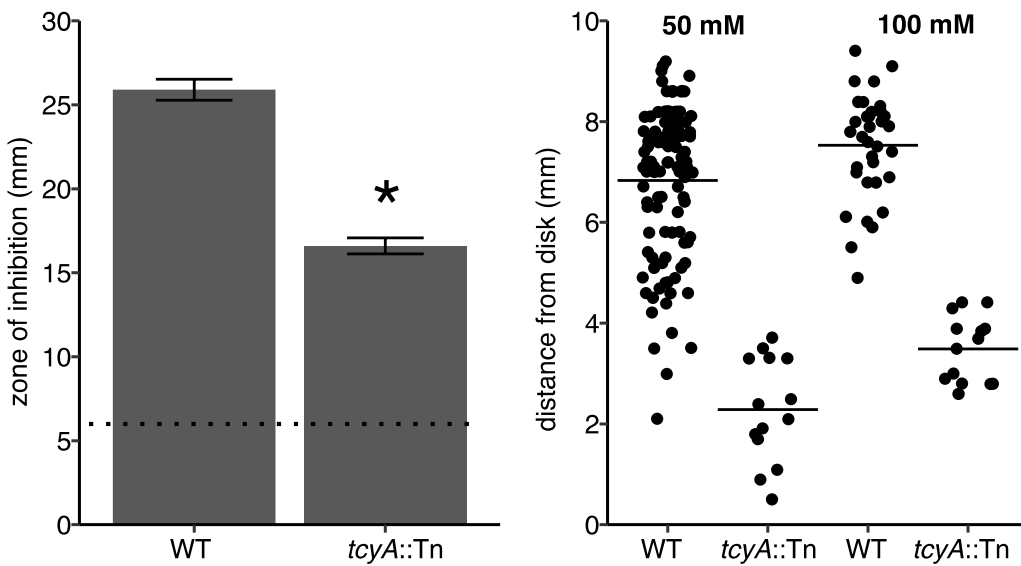

12 **Strain Newman *tcyA* mutants demonstrate enhanced selenocystine resistance. (A)**

13 WT and *tcyA::Tn* were plated as a lawn on TSA and a disk supplemented with 100 mM  
14 selenocystine was added to the plate. The dotted line represents the disk diameter (6  
15 mm). The mean zone of inhibition of at least three independent trials is presented. Error  
16 bars represent  $\pm 1$  standard error of the mean. **(B)** WT Newman or *tcyA::Tn* selenocystine  
17 resistant mutant colonies grew the indicated distance from a sterile Whatman paper disk  
18 containing 50 mM or 100 mM selenocystine. The bar represents the mean distance from  
19 the disk. \* indicates  $P < 0.05$  determined from student's t-test.

21

22 **Figure S2**  
23

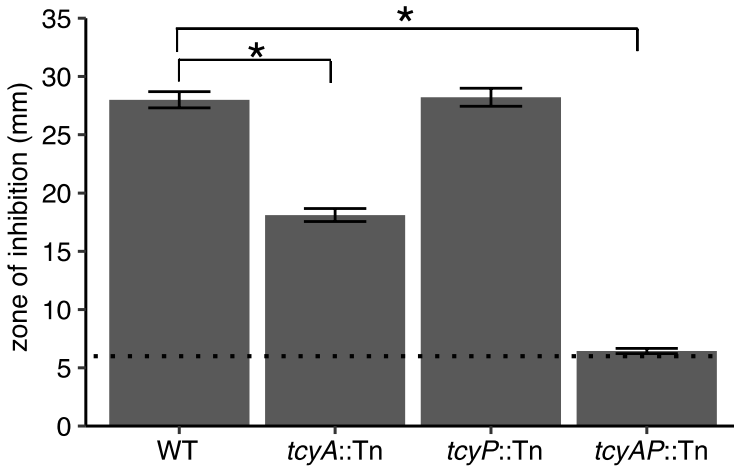

24 **Newman TcyABC and TcyP are required for selenocystine sensitivity.** The zone of  
25 inhibition in the presence of 100 mM selenocystine was measured for WT, *tcyA::Tn*,  
26 *tcyP::Tn*, and *tcyAP::Tn*. The mean zone of inhibition of at least three independent trials  
27 is presented. The dotted line represents the disk diameter (6 mm). The error bars  
28 represent ± 1 standard error of the mean. \* indicates  $P < 0.05$  determined from student's  
29 t-test.  
30

31

32 **Figure S3.**  
 33

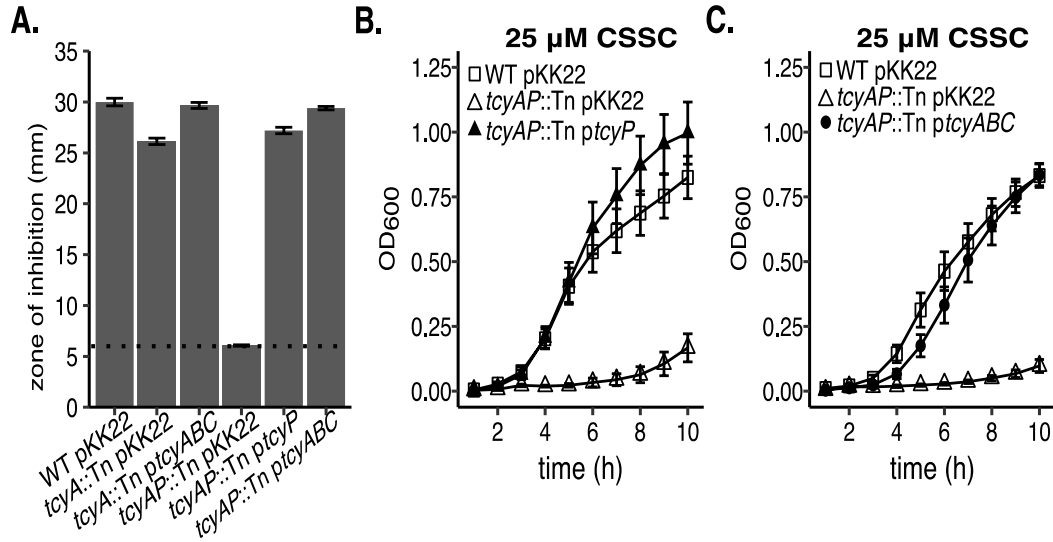

34  
 35  
 36 **Ectopic expression of *tcyP* and *tcyABC* restores selenocystine sensitivity and**  
 37 **growth in cystine-supplemented medium of the *tcyAP* double mutant. (A)**  
 38 Selenocystine resistance of WT harboring a pKK22 empty vector (WT pKK22), the  
 39 *tcyA::Tn* mutant strain harboring a pKK22 empty vector (*tcyA::Tn* pKK22), the *tcyA::Tn*  
 40 mutant harboring pKK22 vector containing *tcyABC* under the control of its native promoter  
 41 (*tcyA::Tn ptcyABC*), the *tcyA::Tn tcyP::Tn* double mutant harboring a pKK22 empty vector  
 42 (*tcyAP::Tn* pKK22), the *tcyA::Tn tcyP::Tn* mutant strain harboring a pKK22 vector  
 43 containing *tcyP* under the control of its native promoter (*tcyAP::Tn ptcyP*), or the *tcyA::Tn*  
 44 *tcyP::Tn* mutant harboring pKK22 vector containing *tcyABC* under the control of its native  
 45 promoter (*tcyAP::Tn ptcyABC*) was determined in the presence of 100 mM selenocystine.  
 46 The dotted line represents the disk diameter (6 mm). **(B-C)** Growth of the indicated strains  
 47 was monitored in medium supplemented with 25 μM cystine. The mean of at least three  
 48 independent trials is presented, error bars represent ± 1 standard error of the mean.

49

50 **Figure S4**

51

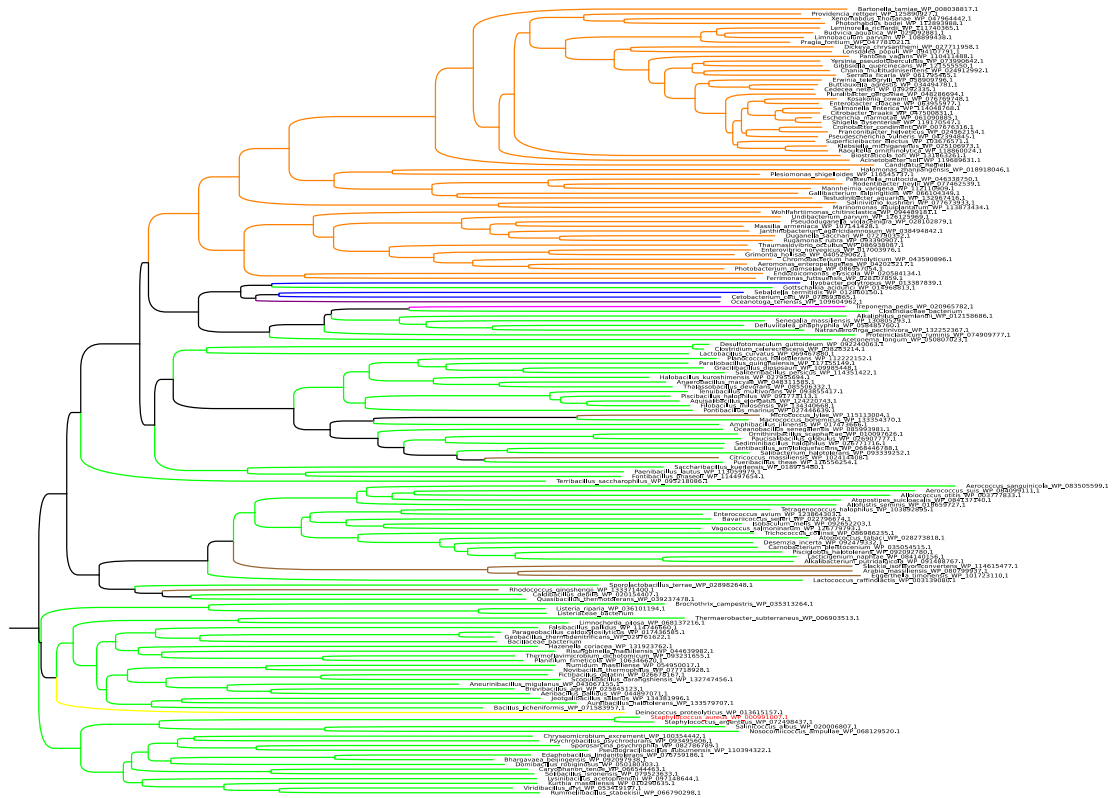

52 **Figure S4.** TcyP is conserved across many bacterial phyla. Homologues of TcyP are  
53 present in proteobacteria (orange), firmicutes (green), fusobacteria (blue), thermotogae  
54 (purple), spirochaetes (magenta), actinobacteria (brown), and deinococcus (yellow). The  
55 query, TcyP protein from *S. aureus*, is highlighted in red.

57  
58

59 **REFERENCES**

60

61 1. **Fey PD, Endres JL, Yajjala VK, Widhelm TJ, Boissy RJ, Bose JL, Bayles KW.**

62 2013. A genetic resource for rapid and comprehensive phenotype screening of  
63 nonessential *Staphylococcus aureus* genes. *MBio* **4**:e00537-12.

64 2. **Duthie ES.** 1952. Variation in the antigenic composition of staphylococcal  
65 coagulase. *J. Gen. Microbiol.* **7**:320–326.

66
